# Supplementary material for: Midbody-Localized Aquaporin Mediates Intercellular Lumen Expansion During Early Cleavage of an Invasive Freshwater Bivalve
Source: Front Cell Dev Biol. 2022 Jun 14;10:894434. doi: 10.3389/fcell.2022.894434 (PMC9237387; doi:10.3389/fcell.2022.894434)
Supplement: Supplementary file 1 [file Table2.XLSX]

## Sheet: Tabelle1
Dreissena rostriformis AQP1
>Gene.75921 *	NCBI TSA accession: GHRL01030692.1	https://www.ncbi.nlm.nih.gov/nuccore/1712667723
MPTIQGRHRQTKILRVFVSLPLFNLFLQLRESGSSDTLETYLLTTTSRPDSDDYLLTTRTLPEDYALTKDNKAYLLTTRTIPEDFPLVKNNRGNRSRDRDDDDLVWIPMSDKKRADASRVSSEEDNSCCAKIRMRTSVEDIRSLYFWKAVFAEFVGTFILVITAVGSCVQGWKDDPLDVVQIALSFGLCVATSVWIIGHISGGHINPAVTCAMLITRRVSLIRAILFIIAQCLGSIAGAGILKALTPAGQVGGLGTTTLNTGVTPAQGFGIELIITMVLVLTVFAACDSKRTDLGGSFPLTIGFAVTVGHLWAVEFTGSSMNPARSLGPAVVMNIWTNHWIYWVGPIAGGVLGGLLYDNILASNASLGKANACLMGSQFDDGENPAQKSNFKQKPVIDG…
* D. rostriformis sequencing data is available from: https://phaidra.univie.ac.at/view/o:980132
Aquaporins (AQP) expressed in egg/zygote and initial cleavage stages
Phylum	Species	Gene	NCBI Reference Sequence	RNA-Seq Database	Database Gene ID	References DOI
Vertebrata	Mouse (Mus musculus)	AQP1	NP_031498	Mouse Genome Database MGI 6.16	MGI:103201
		AQP3	NP_057898.2		MGI:1333777	10.1016/S0012-1606(02)00127-6, 10.1159/000350084 , 10.1007/s10815-013-9965-5
		AQP7	NP_001365568.1		MGI:1314647	10.1159/000350084
		AQP8	NP_001102515.1		MGI:1195271	10.1016/S0012-1606(02)00127-6
		AQP9	NP_001258772.1		MGI:1891066	10.1016/S0012-1606(02)00127-6
		AQP11	NP_780314.1		MGI:1913583	10.12717/devrep.2015.19.1.053
	Clawed frog (Xenopus sp.)	AQP3	NP_001087946.1	Xenbase 5.1.0	XB-GENE-6255923
		AQP-4-like	AW199121			10.1002/dvdy.10180
		AQP-8-like	XP_018092551	Xenbase 5.1.0	XB-GENE-17338139
		AQP9	XP_018108516		XB-GENE-17332301
		AQP11	XP_018103356		XB-GENE-865131
Ambulacraria	Sea Urchin (Strongylocentrotus purpuratus)	AQP-2-like	XP_011683466.2	Echinobase 4.16.1	ECB-GENE-23181232
		AQP3	XP_030832856.1		ECB-GENE-23189579
		AQP-4-like	XP_001190612.2		ECB-GENE-23175854
Ecdysozoa	Fruitfly (Drosophila melanogaster)	Drip	NP_001286316.1	Flybase version FB2021_01	FBgn0015872	10.1152/ajpcell.00612.2004
		Prip	NP_610686.1		FBgn0033635	10.1093/nar/gkaa1026
		Bib	NP_476837.1		FBgn0000180
	Caenorhabditis elegans	AQP2	NP_001366692.1	Wormbase WS279	WBGene00000170	10.1152/ajpcell.00514.2006
		AQP10	NP_496105.1		WBGene00000178
		AQP11	NP_499821.2		WBGene00000179
Lophotrochozoa	Quagga mussle (Dreissena rostriformis)	AQP-4-like	Gene.75921			10.1093/dnares/dsz019
	Pacific oyster (Crassostrea gigas)	AQP-4-like	EKC34522			10.1093/dnares/dsz019, 10.1016/j.cub.2020.10.004
		AQP-8-like	EKC40658
		AQP-11-like	EKC30861
Cnidaria	Starlet sea anemone (Nematostella vectensis)	AQP-2-like	XP_001633212 / EDO41149.p1	NvERTx	NvERTx.4.153656	10.1093/dnares/dsz019
		AQP-4-like	XP_001633187 / EDO41124.p1		NvERTx.4.24955
		AQP-7-like	XP_001637091.1 / EDO45028.p1		NvERTx.4.87852
		AQP-7/9-like	XP_001637090 / EDO45027.p1		NvERTx.4.76641
		AQP-11-like	XP_032231557.1		NvERTx.4.126001

## Sheet: Tabelle2
Crassostrea gigas	Gene	target_id	00_Egg	01_2_cell	02_4_cell	03_Early_morula	04_Morula	05_Blastula	06_Rotary_movement	07_Free_swimming	08_Early_gastrula	09_Gastrula	10_Trochophore_1	11_Trochophore_2	12_Trochophore_3	13_Trochophore_4	14_Trochophore_5	15_Early_D_shape_larva_1	16_Early_D_shape_larva_2	17_D_shape_larva_1	18_D_shape_larva_2	19_D_shape_larva_3	20_D_shape_larva_4	21_D_shape_larva_5	22_D_shape_larva_6	23_D_shape_larva_7	24_Early_umbo_larva_1	25_Early_umbo_larva_2	26_Umbo_larva_1	27_Umbo_larva_2	28_Umbo_larva_3	29_Umbo_larva_4	30_Umbo_larva_5	31_Umbo_larva_6	32_Later_umbo_larva_1	33_Later_umbo_larva_2	34_Pediveliger_1	35_Pediveliger_2	36_Spat	37_Juvenile
Tpms from 10.1016/j.cub.2020.10.004		EKC18308	0	0	0	0	0	0.185511	0	0.169598	0.329618	0.588793	0.561678	0.46261	0.590562	0.335211	1.44563	0.847632	4.20791	8.17496	7.89076	8.18481	8.65036	11.7311	16.1144	10.0317	4.88319	11.0651	6.63098	10.2926	3.32433	9.63088	4.80698	7.25586	7.39281	8.78536	6.80945	6.6439	12.9751	9.92568
		EKC24616	0	0	0	0.132994	0.156367	0	0.119176	0	0.286134	0.255559	0.24379	0	0	0.872969	0.250984	0.735811	2.19168	5.80623	5.29303	4.73671	7.50919	6.78903	15.3467	5.52235	3.74028	2.16895	2.53273	0.734367	3.75151	1.64674	1.66913	1.57466	1.04472	2.85989	3.42224	1.98255	3.83434	38.7732
	AQP-11-like	EKC30861	13.3357	10.0956	7.50216	8.22627	9.39872	10.7488	6.66353	7.87168	7.49941	3.483	2.81143	1.96471	1.61236	2.54223	2.28042	2.57136	3.14871	4.6217	5.00506	6.62114	3.83531	5.69397	5.07828	3.56277	2.52702	3.57323	3.8622	3.97778	7.26093	5.40054	6.02737	8.91455	6.728	4.5529	5.43606	3.46411	5.86226	8.23606
		EKC31383	0.247459	0	0.230233	0.222503	0.261605	0.538842	0.797535	0.49262	0.598386	0.855114	0.407867	0	0.643262	0.486833	1.04976	0.820686	3.25931	3.50782	3.38587	3.67929	4.59035	3.40746	6.02122	5.86322	2.39874	4.40628	5.58556	3.17392	6.75917	4.76832	3.72333	5.2689	6.86649	6.11375	7.80748	3.76916	6.41494	7.20761
		EKC31493	0.275622	0	0.256436	0.123913	0	0.150042	0.111038	0.274342	0	0.952434	0	0.37416	0.477647	1.62672	0	0.685566	0.680672	2.40433	3.48112	3.78279	2.69093	9.17188	12.0211	133.381	42.5155	29.4465	29.0683	23.1494	29.8448	28.9154	29.5479	28.169	26.0031	22.5011	10.4352	9.73964	38.6278	47.2229
		EKC32884	0	0	0	0	0	0.174039	0.1809	0	0	0	0.185027	1.16802	1.25263	1.57846	1.41388	0.211928	1.10893	0.540928	0.297864	0.291794	0.876798	2.57631	2.11663	3.04583	0.517531	2.18418	1.24274	2.1493	1.41066	1.22561	1.54547	1.25166	1.48468	1.59304	0.553214	0.273579	1.27318	1.83081
		EKC32885	0	0	0	0.123913	0.291378	0.236472	0	0	0.133298	0	0.227143	5.86223	10.1646	10.8049	5.27965	5.90993	1.13445	2.04082	4.27583	1.84842	1.88365	3.16272	8.9165	3.38508	1.68792	5.40202	3.83754	3.51946	4.99006	3.6884	3.2866	4.03856	3.87859	3.66963	1.06007	1.17547	0.446564	0.349721
	AQP-4-like	EKC34522	0	0	0	0.750308	12.2033	22.4102	16.3605	16.6118	13.4522	8.41037	17.4215	1.13279	1.44611	0.820832	1.41596	2.30622	1.60283	1.81982	2.04931	3.18129	0.814697	0.957533	0.510801	1.5977	1.05507	1.74806	1.40723	1.4961	1.08537	1.7866	1.0463	1.48062	3.64862	3.58545	5.26556	2.37255	2.028	1.19142
		EKC35416	0	0	0	0	0	0	0	0.270646	0.526007	0.2349	0	0.369119	0.235606	0.267467	0	0.450886	0.223834	1.18597	0.57237	0.932957	1.32734	5.30418	4.36915	8.3948	4.4693	2.84802	2.43381	2.58751	3.183	2.44507	3.83551	2.02632	3.84105	2.33663	0.571925	0.66265	6.38794	6.75507
		EKC35418	0.287397	0	0	0.129207	0.151913	0	0	0.429094	0.277984	0.248281	0.710541	0.390145	0.249026	0	0.487671	1.42971	2.12926	3.44719	3.02487	2.6296	2.5253	3.29783	1.05555	0.825394	0.847877	2.70922	1.90137	1.54581	1.68215	2.09209	1.89186	4.58945	3.91485	4.32202	6.04503	8.22965	4.4236	2.21582
		EKC40657	0	0.372208	0	0.157642	0	0	0	0	0	0	0	0	0	0	0	0	0	0.382349	0	0.401039	0	0	0.160981	0.503522	0.295564	0.734547	0.13646	0.145078	0	0.150148	0.329745	0.373299	0.530713	1.12997	1.47508	2.77724	5.96525	0.600771
	AQP-8-like	EKC40658	40.4704	21.4795	23.3091	17.9779	15.0253	6.55686	3.29962	1.91821	1.39803	2.4973	2.38229	0.654035	0.834932	2.3696	3.27011	4.39405	3.96607	3.1521	8.62047	9.36751	6.11491	11.0569	21.6765	27.6737	17.0565	19.1762	22.8746	16.9437	14.0997	19.5989	15.4044	21.5424	15.0702	12.9382	15.7075	10.5672	36.2978	11.5565
		EKC40659	0	0	0	0.0505313	0	0	0	0.055938	0.271792	0.0970999	0	0	0	0.221123	0	0.0931906	0	0	0	0.128551	0	0.128975	0.0516017	0	0	0.117727	0.218708	0.418534	0.438581	0.433162	0.211396	0.239318	0.226823	1.08662	0.354622	0.890231	3.55109	15.6948
		EKC40660	0	0	0	0	0	0	0	0	0.353493	0	0.301182	0	0	0	0.310069	0	0	0	0	0	0	0	0.50335	0	0	1.91396	1.42226	2.11691	0	1.09545	0.687356	0.389072	0.368758	1.96286	0.768704	0.445322	7.99367	23.4808
