# Supplementary material for: Midbody-Localized Aquaporin Mediates Intercellular Lumen Expansion During Early Cleavage of an Invasive Freshwater Bivalve
Source: Front Cell Dev Biol. 2022 Jun 14;10:894434. doi: 10.3389/fcell.2022.894434 (PMC9237387; doi:10.3389/fcell.2022.894434)
Supplement: Supplementary file 3 [file Table1.XLSX]

## Sheet: Raw Counts
	CELL NUMBER
		Control		Treatment
		C S: 1,5h	C S: 2h	T45min S: 1.5h	T45min S: 2h	T1h S: 1.5h	T1h S: 2h
	1 cell	2	2	63	36	46	46
	2 cells	36	1	0	0	8	18
	3 cell	0	3	0	0	0	0
	4 cells	0	57	0	0	0	0
	n =	38	63	63	36	54	64
	% 1 cell	5.26316	3.1746	100	100	85.1852	71.875
	% 2 cells	94.7368	1.5873	0	0	14.8148	28.125
	% 3 cells	0	4.7619	0	0	0	0
	% 4 cells	0	90.4762	0	0	0	0
	Control S 1.5h				T45 S 1.5h		T45 S 2h		T 1h S 1.5h				T 1h S 2h
n	AB	CD	Cavity	n	Cell	n	Cell	n	AB	CD	Cavity	n	AB	CD	Cavity
1	21455	50078	2316	1	90124	1	87572	1	25888	49240	2898	1	18997	52935	154
2	21651	52887	4050	2	84150	2	108489	2	24330	56275	231	2	17865	52046	288
3	24189	46325	4111	3	99156	3	88085	3	24263	74280	1513	3	18055	54090	196
4	20921	46556	4389	4	81876	4	81745	4	12767	52510	365	4	18172	47944	341
5	20863	52508	3762	5	82743	5	82256	5	19441	57526	415	5	15117	52515	1234
6	18640	49258	4644	6	82853	6	88478	6	22204	46318	482	6	17745	54572	259
7	20136	60282	2225	7	76659	7	75033	7	22569	45824	501	7	17658	53110	42
8	18912	46710	2368	8	79819	8	89411	8	23829	49160	1380	8	17173	53305	412
9	21560	57288	4686	9	73999	9	81454	9	17022	45426	1275	9	16308	57575	1250
10	20840	53637	4307	10	84788	10	79936	10	29005	47758	149	10	14517	50380	261
11	22432	59656	2938	11	77906	11	84724	11	19999	51681	1545	11	17896	63664	486
12	22441	51401	5553	12	84454	12	88116	12	26397	68643	279	12	17457	51909	835
13	22581	53162	2175	13	90287	13	89453	13	17541	51829	1245	13	17083	54089	453
14	18825	60618	1390	14	87755	14	76227	14	32609	75016	361	14	17643	53585	43
15	18272	50583	1421	15	103106	15	108767	15	26781	72846	711	15	16354	57301	750
16	19362	56644	2378	16	95903	16	97806	16	37570	61921	2543	16	16764	50437	561
17	20335	75266	4023	17	82214	17	119888	17	27237	72152	1815	17	17456	50210	361
18	24166	62040	7127	18	86424	18	80311	18	26181	77325	1052	18	22330	53877	121
19	22353	67784	3376	19	82154	19	77625	19	27224	71564	537	19	16979	53955	678
20	23127	61283	3283	20	86242	20	91116	20	33870	77001	552	20	12557	57149	974
21	26286	52400	6236	21	96352	21	87193	21	50516	79976	258	21	16124	51230	137
22	23856	71829	7336	22	84027	22	87278	22	29572	90061	2425	22	12503	62921	1291
23	24508	56285	4967	23	82574	23	86526	23	36045	95757	2721	23	16834	53099	462
Average	21639.6	56281.7	3872.22	24	75090	24	83774	24	29895	66555	1570	24	17114	52483	735
Strd-Deviation	2076.15	7595.62	1617.66	25	86244	25	89519	25	27235	94229	754	25	18505	59212	716
				26	78506	26	105227	26	37103	84715	661	26	19667	54426	612
				27	79275	27	83417	27	32200	73481	450	27	20255	60823	402
					84988.1	28	88028	28	23965	74516	1192	28	18261	52185	423
					7010.61	29	92735	29	25276	83755	1030	29	19201	63871	294
						30	83188	30	29303	64152	814	30	17139	52131	656
						31	80797	31	28163	60877	559	31	15630	56360	297
						32	81541	32	29260	79331	993	32	18528	62912	302
						33	84594	33	29604	83541	415	33	16661	60624	1704
						34	88277	34	22705	89408	1699	34	17289.3	55058.3	537.273
						35	84926	35	25475	75053	1026	35	1888.68	4183.54	387.891
						36	83745	36	31327	77500	846	36	Total Vol.	Cell Vol
							87979.4	37	34020	61261	486
							9372.29	38	49844	79628	1132
								39	33167	72687	2651
								40	36184	59799	686
								41	30208	63700	1466
								42	29344	70305	719
								43	22227	57250	678
								44	34995	68579	410
								45	29674	79808	1634
									28534.1	68671.5	1047.2
									7162.16	13501.9	716.769

## Sheet: Formatted
		Embryo	AB	CD	Cavity	Total Cell Volume
		Control 1,5h	21455	50078	2316	71533
		Control 1,5h	21651	52887	4050	74538
		Control 1,5h	24189	46325	4111	70514
		Control 1,5h	20921	46556	4389	67477
		Control 1,5h	20863	52508	3762	73371
		Control 1,5h	18640	49258	4644	67898
		Control 1,5h	20136	60282	2225	80418
		Control 1,5h	18912	46710	2368	65622
		Control 1,5h	21560	57288	4686	78848
		Control 1,5h	20840	53637	4307	74477
		Control 1,5h	22432	59656	2938	82088
		Control 1,5h	22441	51401	5553	73842
		Control 1,5h	22581	53162	2175	75743
		Control 1,5h	18825	60618	1390	79443
		Control 1,5h	18272	50583	1421	68855
		Control 1,5h	19362	56644	2378	76006
		Control 1,5h	20335	75266	4023	95601
		Control 1,5h	24166	62040	7127	86206
		Control 1,5h	22353	67784	3376	90137
		Control 1,5h	23127	61283	3283	84410
		Control 1,5h	26286	52400	6236	78686
		Control 1,5h	23856	71829	7336	95685
		Control 1,5h	24508	56285	4967	80793
		T (1h) 1.5h	25888	49240	2898	75128
		T (1h) 1.5h	24330	56275	231	80605
		T (1h) 1.5h	24263	74280	1513	98543
		T (1h) 1.5h	12767	52510	365	65277
		T (1h) 1.5h	19441	57526	415	76967
		T (1h) 1.5h	22204	46318	482	68522
		T (1h) 1.5h	22569	45824	501	68393
		T (1h) 1.5h	23829	49160	1380	72989
		T (1h) 1.5h	17022	45426	1275	62448
		T (1h) 1.5h	29005	47758	149	76763
		T (1h) 1.5h	19999	51681	1545	71680
		T (1h) 1.5h	26397	68643	279	95040
		T (1h) 1.5h	17541	51829	1245	69370
		T (1h) 1.5h	32609	75016	361	107625
		T (1h) 1.5h	26781	72846	711	99627
		T (1h) 1.5h	37570	61921	2543	99491
		T (1h) 1.5h	27237	72152	1815	99389
		T (1h) 1.5h	26181	77325	1052	103506
		T (1h) 1.5h	27224	71564	537	98788
		T (1h) 1.5h	33870	77001	552	110871
		T (1h) 1.5h	50516	79976	258	130492
		T (1h) 1.5h	29572	90061	2425	119633
		T (1h) 1.5h	36045	95757	2721	131802
		T (1h) 1.5h	29895	66555	1570	96450
		T (1h) 1.5h	27235	94229	754	121464
		T (1h) 1.5h	37103	84715	661	121818
		T (1h) 1.5h	32200	73481	450	105681
		T (1h) 1.5h	23965	74516	1192	98481
		T (1h) 1.5h	25276	83755	1030	109031
		T (1h) 1.5h	29303	64152	814	93455
		T (1h) 1.5h	28163	60877	559	89040
		T (1h) 1.5h	29260	79331	993	108591
		T (1h) 1.5h	29604	83541	415	113145
		T (1h) 1.5h	22705	89408	1699	112113
		T (1h) 1.5h	25475	75053	1026	100528
		T (1h) 1.5h	31327	77500	846	108827
		T (1h) 1.5h	34020	61261	486	95281
		T (1h) 1.5h	49844	79628	1132	129472
		T (1h) 1.5h	33167	72687	2651	105854
		T (1h) 1.5h	36184	59799	686	95983
		T (1h) 1.5h	30208	63700	1466	93908
		T (1h) 1.5h	29344	70305	719	99649
		T (1h) 1.5h	22227	57250	678	79477
		T (1h) 1.5h	34995	68579	410	103574
		T (1h) 1.5h	29674	79808	1634	109482
		T (1h) 2h	18997	52935	154	71932
		T (1h) 2h	17865	52046	288	69911
		T (1h) 2h	18055	54090	196	72145
		T (1h) 2h	18172	47944	341	66116
		T (1h) 2h	15117	52515	1234	67632
		T (1h) 2h	17745	54572	259	72317
		T (1h) 2h	17658	53110	42	70768
		T (1h) 2h	17173	53305	412	70478
		T (1h) 2h	16308	57575	1250	73883
		T (1h) 2h	14517	50380	261	64897
		T (1h) 2h	17896	63664	486	81560
		T (1h) 2h	17457	51909	835	69366
		T (1h) 2h	17083	54089	453	71172
		T (1h) 2h	17643	53585	43	71228
		T (1h) 2h	16354	57301	750	73655
		T (1h) 2h	16764	50437	561	67201
		T (1h) 2h	17456	50210	361	67666
		T (1h) 2h	22330	53877	121	76207
		T (1h) 2h	16979	53955	678	70934
		T (1h) 2h	12557	57149	974	69706
		T (1h) 2h	16124	51230	137	67354
		T (1h) 2h	12503	62921	1291	75424
		T (1h) 2h	16834	53099	462	69933
		T (1h) 2h	17114	52483	735	69597
		T (1h) 2h	18505	59212	716	77717
		T (1h) 2h	19667	54426	612	74093
		T (1h) 2h	20255	60823	402	81078
		T (1h) 2h	18261	52185	423	70446
		T (1h) 2h	19201	63871	294	83072
		T (1h) 2h	17139	52131	656	69270
		T (1h) 2h	15630	56360	297	71990
		T (1h) 2h	18528	62912	302	81440
		T (1h) 2h	16661	60624	1704	77285
		T (45min) 1.5h				90124
		T (45min) 1.5h				84150
		T (45min) 1.5h				99156
		T (45min) 1.5h				81876
		T (45min) 1.5h				82743
		T (45min) 1.5h				82853
		T (45min) 1.5h				76659
		T (45min) 1.5h				79819
		T (45min) 1.5h				73999
		T (45min) 1.5h				84788
		T (45min) 1.5h				77906
		T (45min) 1.5h				84454
		T (45min) 1.5h				90287
		T (45min) 1.5h				87755
		T (45min) 1.5h				103106
		T (45min) 1.5h				95903
		T (45min) 1.5h				82214
		T (45min) 1.5h				86424
		T (45min) 1.5h				82154
		T (45min) 1.5h				86242
		T (45min) 1.5h				96352
		T (45min) 1.5h				84027
		T (45min) 1.5h				82574
		T (45min) 1.5h				75090
		T (45min) 1.5h				86244
		T (45min) 1.5h				78506
		T (45min) 1.5h				79275
		T (45min) 2h				87572
		T (45min) 2h				108489
		T (45min) 2h				88085
		T (45min) 2h				81745
		T (45min) 2h				82256
		T (45min) 2h				88478
		T (45min) 2h				75033
		T (45min) 2h				89411
		T (45min) 2h				81454
		T (45min) 2h				79936
		T (45min) 2h				84724
		T (45min) 2h				88116
		T (45min) 2h				89453
		T (45min) 2h				76227
		T (45min) 2h				108767
		T (45min) 2h				97806
		T (45min) 2h				119888
		T (45min) 2h				80311
		T (45min) 2h				77625
		T (45min) 2h				91116
		T (45min) 2h				87193
		T (45min) 2h				87278
		T (45min) 2h				86526
		T (45min) 2h				83774
		T (45min) 2h				89519
		T (45min) 2h				105227
		T (45min) 2h				83417
		T (45min) 2h				88028
		T (45min) 2h				92735
		T (45min) 2h				83188
		T (45min) 2h				80797
		T (45min) 2h				81541
		T (45min) 2h				84594
		T (45min) 2h				88277
		T (45min) 2h				84926
		T (45min) 2h				83745

## Sheet: Formatted %
	Control 1,5h	Control 2h	T (45min) 1.5h	T (45min) 2h	T (1h) 1.5h	T (1h) 2h
% 1 cell	5.26316	3.1746	100	100	85.1852	71.875
% 2 cells	94.7368	1.5873	0	0	14.8148	28.125
% 3 cells	0	4.7619	0	0	0	0
% 4 cells	0	90.4762	0	0	0	0

## Sheet: Total Cell Vol
	Control 1.5h	T45 S 1.5h	T45 S 2h	T 1h S 1.5h	T 1h S 2h
	71533	90124	87572	75128	71932
	74538	84150	108489	80605	69911
	70514	99156	88085	98543	72145
	67477	81876	81745	65277	66116
	73371	82743	82256	76967	67632
	67898	82853	88478	68522	72317
	80418	76659	75033	68393	70768
	65622	79819	89411	72989	70478
	78848	73999	81454	62448	73883
	74477	84788	79936	76763	64897
	82088	77906	84724	71680	81560
	73842	84454	88116	95040	69366
	75743	90287	89453	69370	71172
	79443	87755	76227		71228
	68855	103106	108767		73655
	76006	95903	97806		67201
	95601	82214	119888		67666
	86206	86424	80311		76207
	90137	82154	77625		70934
	84410	86242	91116		69706
	78686	96352	87193		67354
	95685	84027	87278		75424
	80793	82574	86526		69933
		75090	83774		69597
		86244	89519		77717
		78506	105227		74093
		79275	83417		81078
			88028		70446
			92735		83072
			83188		69270
			80797		71990
			81541		81440
			84594		77285
			88277
			84926
			83745
	77921.3	84988.1	87979.4	75517.3	72347.7
	8159.96	7010.61	9372.29	10285.4	4581.36

## Sheet: Stats code
	---
	title: "AQP plots"
	output: html_document
	---
	```{r setup, include=FALSE}
	knitr::opts_chunk$set(echo = TRUE)
	```
	```{r}
	library(readr)
	library(tidyr)
	library(ggplot2)
	library(gridExtra)
	library(reshape2)
	library(scales)
	library(grid)
	library(stringr)
	library(ggpubr)
	library(cowplot)
	library(RColorBrewer)
	```
	```{r}
	df_cell_nb <- readr::read_delim('Cells_percentages.tsv', delim = '\t')
	```
	add a column called "percentage_of_cells" in df_cells_nb that counts the percentages for each Treatment/fixation time combination
	Transform Fixation time and treatment time into factors, set up the levels to have them ordered
	```{r}
	df_cell_nb <- readr::read_delim('Cells_percentages.tsv', delim = '\t')
	df_cell_nb <- df_cell_nb %>%
	dplyr::group_by(stage, Treatment_time) %>%
	dplyr::mutate(percentage_of_cells=round(n/sum(n)*100, 0))
	df_cell_nb$stage <- factor(df_cell_nb$stage, levels = c("1.5hpf", "2hpf"))
	df_cell_nb$Treatment_time <- factor(df_cell_nb$Treatment_time, levels = c("Control", "Nocodazole (45mpf)", "Nocodazole (1hpf)"))
	```
	Pie chart. Pie charts accept percentages, facetting makes it so that one facet gets a Treatment/stage combination (sum of percentages there are 100%, as we set it up in the prveious operations)
	```{r}
	p <- ggplot(df_cell_nb, aes(x="", y=percentage_of_cells, fill=Number_of_cells)) +
	geom_bar(stat="identity", width=1) +
	coord_polar("y", start=0) +
	facet_grid(Treatment_time ~ stage,
	switch = 'y', #Moves the facet labels of Y (default on the right) to the left
	labeller = label_wrap_gen(width = 2, multi_line = TRUE)) + #If one label is too long, wraps the text to facet label width
	labs(x = "", y = "", fill = NULL) + #no labels for x and y axis, the facets labels are already clear enough
	cowplot::theme_cowplot(font_size = 8) +
	theme(axis.line = element_blank(),
	axis.text = element_blank(),
	axis.ticks = element_blank()) +
	scale_fill_manual(values=c('#a6611a','#dfc27d','#80cdc1','#018571'))
	```
	```{r}
	ggsave('percent_of_cells.pdf',
	plot = p,
	width = 8,
	height = 10,
	unit = 'cm')
	```
	```{r}
	df_vol <- readr::read_delim('Volumes.tsv', delim = '\t')
	```
	```{r}
	df_vol$Treatment <- factor(df_vol$Treatment, levels = c('Control 1.5hpf', 'Nocodazole (45mpf) 1.5hpf', 'Nocodazole (45mpf) 2hpf', 'Nocodazole (1hpf) 1.5hpf' , 'Nocodazole (1hpf) 2hpf'))
	df_vol$AB <- as.numeric(df_vol$AB)
	df_vol$CD <- as.numeric(df_vol$CD)
	df_vol$Cavity <- as.numeric(df_vol$Cavity)
	```
	transform dataframe to have one measure (i.e. one volume) by row
	```{r}
	df_vol <- tibble::tibble(reshape2::melt(df_vol,
	id.vars = c('Treatment'),
	value.name = 'volume',
	variable = 'object'))
	df_vol <- drop_na(df_vol)
	```
	Make the custom color palette
	```{r}
	my_colors <- c("#f7f7f7", "#b2abd2", "#5e3c99", "#fdb863", "#e66101")
	names(my_colors) <- c('Control 1.5hpf', 'Nocodazole (45mpf) 1.5hpf', 'Nocodazole (45mpf) 2hpf', 'Nocodazole (1hpf) 1.5hpf' , 'Nocodazole (1hpf) 2hpf')
	my_scale <- ggplot2::scale_fill_manual(name = 'Treatment', values = my_colors) # Specify scale_fill_manual
	```
	function to make the plot
	```{r}
	map_signif_level <- c(`****` = 1e-04, `***` = 0.001, `**` = 0.01, `*` = 0.05, ns = 1)
	make_plot <- function(tbl,
	comparisons,
	myobject,
	ylims) {
	h = ylims[2] - ylims[1]
	bracket_y = c(.9,.85,.8,.75)*h + ylims[1]
	mydf <- tbl %>% dplyr::filter(object == myobject)
	ggplot2::ggplot(mydf, aes(x = Treatment, y = volume, fill = Treatment)) +
	geom_violin(lwd = .25,
	trim = F) +
	geom_boxplot(width = .1,
	outlier.shape = NA,
	lwd = .25,
	fill = 'white') +
	ggplot2::theme_grey(base_size = 6) +
	theme(legend.position = 'none') +
	scale_x_discrete(labels = function(x) stringr::str_wrap(x, width = 10)) +#wraps labels longer than 10 characters
	scale_y_continuous(limits = ylims,
	labels = scales::comma) +
	my_scale +
	geom_signif(comparisons = comparisons,
	test = "wilcox.test", test.args = list(paired = FALSE, exact = FALSE), na.rm = TRUE,
	map_signif_level = map_signif_level,
	color="black",
	tip_length = 0.01,
	size = .25,
	textsize = 1.25,
	y_position = bracket_y, data = NULL) +
	labs(x = '',
	y = '',
	title = myobject)
	}
	```
	```{r}
	pAB <- make_plot(df_vol,
	comparisons = list(c('Control 1.5hpf', 'Nocodazole (1hpf) 1.5hpf'),
	c('Nocodazole (1hpf) 1.5hpf', 'Nocodazole (1hpf) 2hpf')),
	myobject = 'AB',
	ylims = c(0,70000))
	pCD <- make_plot(df_vol,
	comparisons = list(c('Control 1.5hpf', 'Nocodazole (1hpf) 1.5hpf'),
	c('Nocodazole (1hpf) 1.5hpf', 'Nocodazole (1hpf) 2hpf')),
	myobject = 'CD',
	ylims = c(0,140000))#30000
	ptot <- make_plot(df_vol,
	comparisons = list(c('Control 1.5hpf', 'Nocodazole (45mpf) 1.5hpf'),
	c('Nocodazole (45mpf) 1.5hpf', 'Nocodazole (1hpf) 1.5hpf'),
	c('Nocodazole (45mpf) 1.5hpf', 'Nocodazole (45mpf) 2hpf'),
	c('Control 1.5hpf', 'Nocodazole (1hpf) 1.5hpf'),
	c('Nocodazole (1hpf) 1.5hpf', 'Nocodazole (1hpf) 2hpf'),
	c('Nocodazole (45mpf) 2hpf', 'Nocodazole (1hpf) 2hpf'))
	myobject = 'Total_Cell_Volume',
	ylims = c(0,220000))#30000
	pcav <- make_plot(df_vol,
	comparisons = list(c('Control 1.5hpf', 'Nocodazole (1hpf) 1.5hpf'),
	c('Nocodazole (1hpf) 1.5hpf', 'Nocodazole (1hpf) 2hpf')),
	myobject = 'Cavity',
	ylims = c(0,11500))
	```
	```{r}
	gridplot <- gridExtra::grid.arrange(grobs = list(pAB,pCD,ptot,pcav), ncol = 2)
	ggsave('volumes.pdf',
	plot = gridplot,
	width = 13,
	height = 13,
	unit = 'cm')
	```
